# Supplementary material for: Anti-EGFR Antibody–Drug Conjugate Carrying an Inhibitor Targeting CDK Restricts Triple-Negative Breast Cancer Growth
Source: PubMed Central journal article supplement (PMC11292198; doi:10.1158/1078-0432.ccr-23-3110), 2024-05-21
Supplement: ccr-23-3110_supplementary_figure_1_suppsf1.pdf [file ccr-23-3110_supplementary_figure_1_suppsf1.pdf]

## IHC-defined subtypes

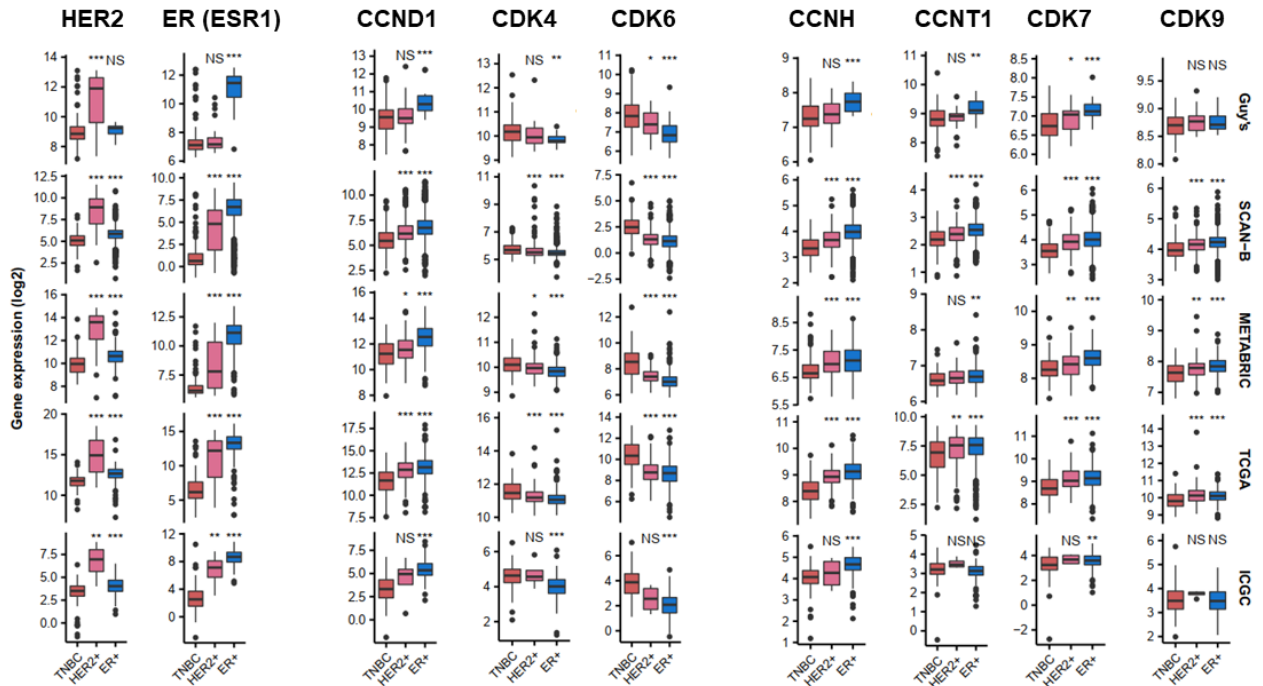

## PAM50 subtypes

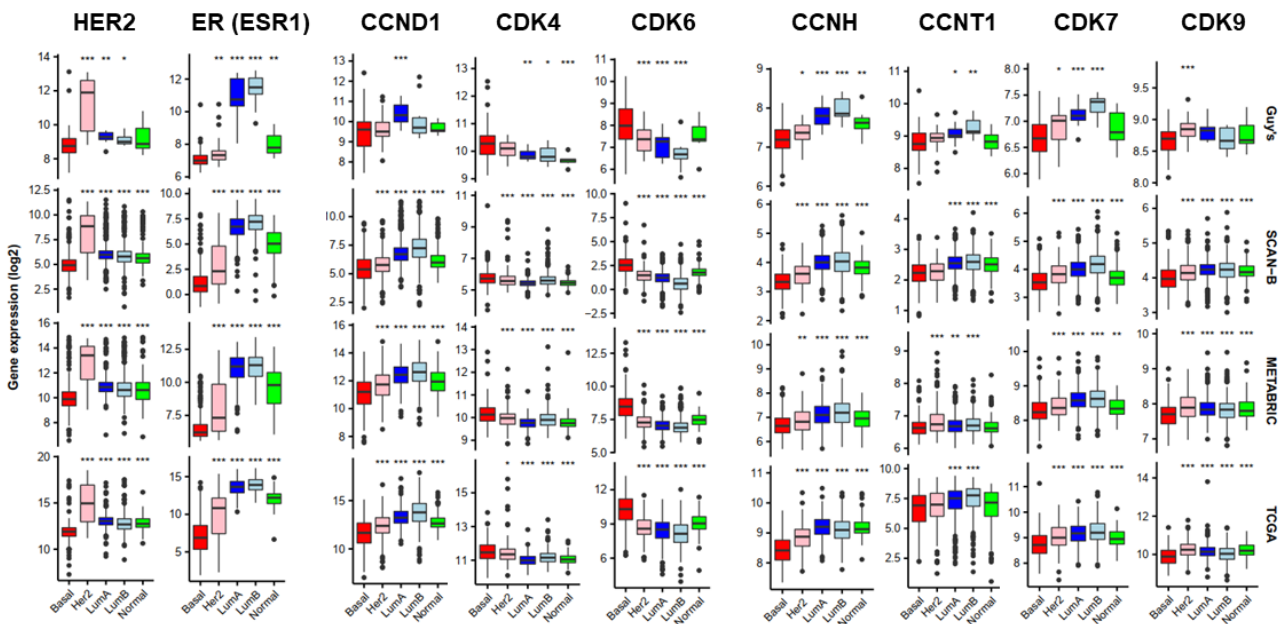

**Supplementary Figure 1. Expression of G1/S-phase cell cycle genes and transcriptional regulators with basal-like/TNBCs.**

The expression of HER2 and ER (ESR1) were evaluated as internal controls for the TNBC subtype. Gene expression analysis of G1/S-phase cell cycle genes cyclin D (CCND1), CDK4, CDK6 and transcriptional regulators CDK7/cyclin H (CCNH) and CDK9/cyclin T (CCNT1) were stratified according to their IHC-defined (top panels) and PAM50 (bottom panels) subtypes (see Figure 1). All *P*-values are compared against the TNBC or Basal-like subtype.
