# Supplementary material for: Anti-EGFR Antibody–Drug Conjugate Carrying an Inhibitor Targeting CDK Restricts Triple-Negative Breast Cancer Growth
Source: PubMed Central journal article supplement (PMC11292198; doi:10.1158/1078-0432.ccr-23-3110), 2024-05-21
Supplement: ccr-23-3110_supplementary_figure_3_suppsf3.pdf [file ccr-23-3110_supplementary_figure_3_suppsf3.pdf]

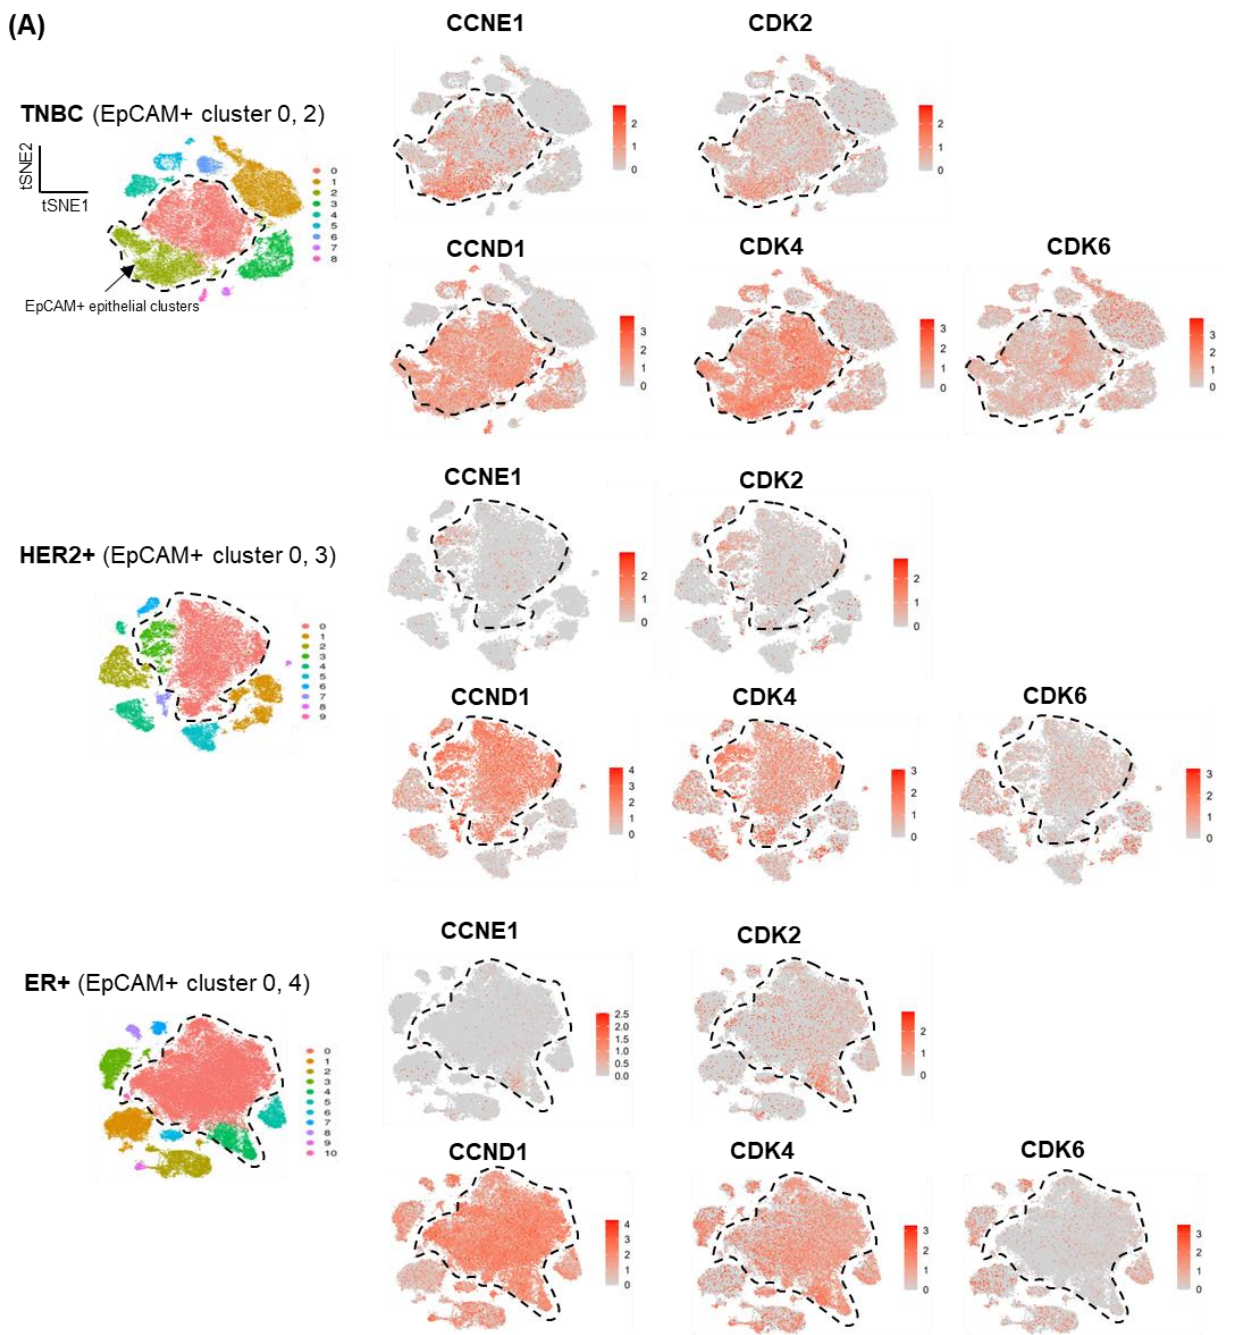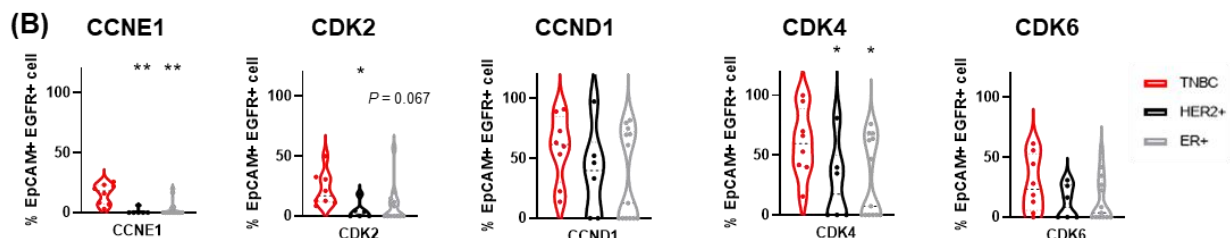

**Supplementary Figure 3. Single-cell RNA sequencing analysis of G1/S-phase cell cycle genes in breast cancer.**

**(A)** Dimensionality reduction t-SNE maps of G1/S phase CDKs and cyclins expression in EpCAM+EGFR+ cells, and **(B)** analyses demonstrated CDK2 and cyclin E are upregulated in TNBCs (see Figure 2A and 2B). Although CDK4 is upregulated, its binding partners (CDK6 and cyclin D) are not in upregulated in TNBCs. *P*-values determined by two-tailed unpaired *t* test against TNBC subtype.
