# Supplementary material for: Anti-EGFR Antibody–Drug Conjugate Carrying an Inhibitor Targeting CDK Restricts Triple-Negative Breast Cancer Growth
Source: PubMed Central journal article supplement (PMC11292198; doi:10.1158/1078-0432.ccr-23-3110), 2024-05-21
Supplement: ccr-23-3110_supplementary_table_1_suppst1.pdf [file ccr-23-3110_supplementary_table_1_suppst1.pdf]

**Cohorts for Figure 1**

|                                                                                                                                                                                                              |                                                                                                                                                                                                                                                                                                                                                                                                                                                                                                                                                                                                                                                                                                                                                                                                               |
|--------------------------------------------------------------------------------------------------------------------------------------------------------------------------------------------------------------|---------------------------------------------------------------------------------------------------------------------------------------------------------------------------------------------------------------------------------------------------------------------------------------------------------------------------------------------------------------------------------------------------------------------------------------------------------------------------------------------------------------------------------------------------------------------------------------------------------------------------------------------------------------------------------------------------------------------------------------------------------------------------------------------------------------|
| <p><b>Transcriptomic data – Primary breast cancers</b><br/> <i>Guy's</i><br/> <i>SCAN-B</i><br/> <i>METABRIC</i><br/> <i>TCGA breast cancer</i><br/> <i>ICGC</i><br/>                 References [26-30]</p> | <p><b>Samples:</b><br/>                 Total primary breast cancer samples, <math>n = 6173</math>:<br/>                 Guy's: primary TNBC, <math>n = 131</math>; HER2+, <math>n = 32</math>; ER+, <math>n = 14</math>;<br/>                 SCAN-B: primary TNBC, <math>n = 165</math>; HER2+, <math>n = 420</math>; ER+, <math>n = 2425</math>;<br/>                 METABRIC: primary TNBC, <math>n = 101</math>; HER2+, <math>n = 117</math>; ER+, <math>n = 347</math>;<br/>                 TCGA: primary TNBC, <math>n = 112</math>; HER2+, <math>n = 158</math>; ER+, <math>n = 426</math>;<br/>                 ICGC: primary TNBC, <math>n = 73</math>; HER2+, <math>n = 4</math>; ER+, <math>n = 182</math></p> <p style="text-align: right;"><b>(Figure 1A, 1B; Supplementary Figure 1)</b></p> |
| <p><b>Transcriptomic data – Post-neoadjuvant chemotherapy-resistant residual TNBCs</b><br/> <i>Matched baseline-residual TNBC cohort</i><br/>                 References [31]</p>                            | <p><b>Samples:</b><br/>                 Total matched primary and residual TNBC samples, <math>n = 27</math> of which:<br/>                 King's College London: (<math>n = 8</math>);<br/>                 Royal Marsden Hospital (<math>n = 9</math>);<br/>                 The Netherlands Cancer Institute (<math>n = 10</math>).</p> <p style="text-align: right;"><b>(Figure 1C)</b></p>                                                                                                                                                                                                                                                                                                                                                                                                              |

**Cohorts for Figure 2**

|                                                                                                                           |                                                                                                                                                                                                                                                                                                                                                                                                                                           |
|---------------------------------------------------------------------------------------------------------------------------|-------------------------------------------------------------------------------------------------------------------------------------------------------------------------------------------------------------------------------------------------------------------------------------------------------------------------------------------------------------------------------------------------------------------------------------------|
| <p><b>Single-cell RNA sequencing data:</b><br/> <i>scRNA-seq cohort</i><br/>                 References [32]</p>          | <p><b>Samples:</b><br/>                 Total samples, <math>n = 27</math> primary samples, 150290 cells, of which:<br/>                 TNBC (<math>n = 8</math> samples, 54819 cells);<br/>                 HER2+ (<math>n = 6</math> samples, 31917 cells);<br/>                 ER+ (<math>n = 13</math> samples, 63554 cells).</p> <p style="text-align: right;"><b>(Figure 2A, 2B, 2C; Supplementary Figure 2A, 2B, 3A, 3B)</b></p> |
| <p><b>Spatial transcriptomic data:</b><br/> <i>Spatial transcriptomic cohort</i><br/>                 References [33]</p> | <p><b>Samples:</b><br/>                 TNBC samples, <math>n = 22</math> patients, with 43 tumor sections of which:<br/>                 Primary (pre-treatment), <math>n = 13</math> patients with 26 tumor sections;<br/>                 Residual (post-NAC), <math>n = 9</math> patients with 17 tumor sections.</p> <p style="text-align: right;"><b>(Figure 2D)</b></p>                                                            |

**Cohort for Figure 3**

|                                                                                                                                                                                                                      |                                                                                                                                                                                                                   |
|----------------------------------------------------------------------------------------------------------------------------------------------------------------------------------------------------------------------|-------------------------------------------------------------------------------------------------------------------------------------------------------------------------------------------------------------------|
| <p><b>Transcriptomic data - cell line:</b><br/> <i>Cancer Cell Line Encyclopedia (CCLE)</i><br/>                 (<a href="https://portals.broadinstitute.org/ccle">https://portals.broadinstitute.org/ccle</a>)</p> | <p><b>Samples:</b><br/>                 CCLE database was used to characterize mRNA expression of EGFR, cyclin A, cyclin E and CDK2 in human cell lines.</p> <p style="text-align: right;"><b>(Figure 3B)</b></p> |
|----------------------------------------------------------------------------------------------------------------------------------------------------------------------------------------------------------------------|-------------------------------------------------------------------------------------------------------------------------------------------------------------------------------------------------------------------|

**Supplementary Table 1.** Summary of transcriptomic datasets from different patient cohorts.
