# Supplementary material for: Anti-EGFR Antibody–Drug Conjugate Carrying an Inhibitor Targeting CDK Restricts Triple-Negative Breast Cancer Growth
Source: PubMed Central journal article supplement (PMC11292198; doi:10.1158/1078-0432.ccr-23-3110), 2024-05-21
Supplement: ccr-23-3110_supplementary_table_2_suppst2.pdf [file ccr-23-3110_supplementary_table_2_suppst2.pdf]

|                                               |                                                   |
|-----------------------------------------------|---------------------------------------------------|
| <b>Gender (n = 35)</b>                        |                                                   |
| Female                                        | 35 (100.0%)                                       |
| Male                                          | 0 (0.0%)                                          |
| <b>Cancer type (n = 35)</b>                   |                                                   |
| TNBC                                          | 28 (80.0%)                                        |
| ER+                                           | 5 (14.3%)                                         |
| HER2+                                         | 2 (5.7%)                                          |
| <b>Treatment naïve (Yes/No) (n = 35)</b>      |                                                   |
| Yes                                           | 14 (40.0%)                                        |
| No                                            | 21 (60.0%)                                        |
| <b>Tumor site (n = 35)</b>                    |                                                   |
| Primary                                       | 26 (74.3%)                                        |
| Local recurrence                              | 1 (2.9%)                                          |
| Lymph node                                    | 4 (11.4%)                                         |
| Pleural effusion                              | 1 (2.9%)                                          |
| Ascites                                       | 1 (2.9%)                                          |
| Metastatic breast cancer                      | 2 (5.7%)                                          |
| <b>TMA PDX sample (n = 38)</b>                |                                                   |
| Directly from patient                         | 36 (95.0%) (two samples taken from MAN10 patient) |
| PDX residual disease after olaparib treatment | 2 (5.0%)                                          |

**Supplementary Table 2.** Disease characteristics of breast cancer patients for PDX TMA samples (please see Figure 6C-6F).
